# Supplementary material for: Progressive Oncological Surgery Is Associated with Increased Curative Resection Rates and Improved Survival in Metastatic Colorectal Cancer
Source: MDPI journal article supplement (doi:10.3390/cancers11020218), 2019-02-14
Supplement: s1 [file s1]

# Supplementary Materials: Progressive Oncological Surgery Is Associated with Increased Curative Resection Rates and Improved Survival in Metastatic Colorectal Cancer

Florian Primavesi, Stefan Stättner, Tarkan Jäger, Georg Göbel, Jaroslav Presl, Katerina Tomanová, Selina Buchner, Manuel Maglione, Thomas Resch, Jörg Hutter, Dietmar Öfner and Adam Dinnewitzer

**Table S1.** Demographic, clinical and pathological characteristics of all patients.

| Variable                                               | 2003–2006<br><i>n</i> = 146 | 2007–2010<br><i>n</i> = 142 | 2011–2014<br><i>n</i> = 132 | <i>p</i> -<br>value * |
|--------------------------------------------------------|-----------------------------|-----------------------------|-----------------------------|-----------------------|
| <b>Age at stage IV diagnosis:</b> Mean (SD)            | 66.7 (11.1)                 | 68.2 (11.5)                 | 68.2 (12.1)                 | 0.403†                |
| <b>BMI:</b> Mean (SD)                                  | 25.5 (4.2)                  | 25.5 (4.2)                  | 25.0 (4.6)                  | 0.550†                |
| <b>Sex:</b> Male                                       | 100 (69%)                   | 84 (59%)                    | 78 (59%)                    | 0.168                 |
| <b>ASA</b>                                             |                             |                             |                             |                       |
| - 1                                                    | 13 (9%)                     | 15 (11%)                    | 6 (5%)                      | 0.530                 |
| - 2                                                    | 71 (49.0%)                  | 65 (46%)                    | 70 (53%)                    |                       |
| - 3                                                    | 52 (36%)                    | 55 (39%)                    | 47 (36%)                    |                       |
| - 4                                                    | 9 (6%)                      | 6 (4%)                      | 9 (7%)                      |                       |
| - 5                                                    | 0 (0%)                      | 1 (1%)                      | 0 (0%)                      |                       |
| <b>Primary TU Location</b>                             |                             |                             |                             | 0.677                 |
| - Colon                                                | 86 (59%)                    | 89 (63%)                    | 84 (64%)                    |                       |
| - Rectum                                               | 59 (40%)                    | 51 (36%)                    | 45 (34%)                    |                       |
| - Both                                                 | 1 (1%)                      | 2 (1%)                      | 3 (2%)                      |                       |
| <b>Primary TU UICC Stage</b>                           |                             |                             |                             | 0.603                 |
| - I                                                    | 6 (4%)                      | 5 (4%)                      | 6 (5%)                      |                       |
| - II                                                   | 14 (10%)                    | 13 (9%)                     | 9 (7%)                      |                       |
| - III                                                  | 42 (29%)                    | 29 (20%)                    | 29 (22%)                    |                       |
| - IV                                                   | 84 (58%)                    | 95 (67%)                    | 88 (67%)                    |                       |
| <b>Timing of metastasis:</b><br>synchronous (6 months) | 93 (64%)                    | 96 (68%)                    | 91 (69%)                    | 0.624                 |
| <b>CEA at stage IV</b> (mean; ng/ml)                   | 277.6 (915)                 | 218.6 (622)                 | 267.6 (1002)                | 0.846†                |
| <b>Initial metastatic site</b>                         |                             |                             |                             |                       |
| - Hepatic                                              | 108 (74%)                   | 104 (73%)                   | 96 (73%)                    | 0.972                 |
| - Pulmonary                                            | 35 (24%)                    | 47 (33%)                    | 50 (38%)                    | 0.039                 |
| - Hepatic + Pulmonary                                  | 19 (13%)                    | 22 (16%)                    | 26 (20%)                    | 0.295                 |
| - Peritoneal                                           | 29 (20%)                    | 28 (20%)                    | 27 (21%)                    | 0.987                 |
| - Distant lymph nodes                                  | 19 (13%)                    | 12 (9%)                     | 6 (5%)                      | 0.046                 |
| - Others                                               | 14 (10%)                    | 12 (9%)                     | 13 (10%)                    | 0.913                 |

\*  $\chi^2$  or Fisher's exact test, except †ANOVA. ASA = American Society of Anaesthesiologists; BMI = Body mass index; CEA = carcinoembryogenic antigen; SD = standard deviation.

**Table S2.** Data on chemotherapy for A) all patients B) palliative patients (PAT) group.

| Variable                                                    | 2003–2006<br><i>n</i> = 146 | 2007–2010<br><i>n</i> = 142 | 2011–2014<br><i>n</i> = 132 | <i>p</i> -value * |
|-------------------------------------------------------------|-----------------------------|-----------------------------|-----------------------------|-------------------|
| <b>(A) Chemotherapy in whole cohort (% of all patients)</b> |                             |                             |                             |                   |
| Chemotherapy received since first diagnosis of metastasis   | 113 (79%)                   | 120 (85%)                   | 108 (82%)                   | 0.487             |
| - Number of CTX cycles (months) received: mean (range)      | 10.0 (0–31)                 | 9.5 (0–31)                  | 7.9 (0–33)                  | 0.055†            |
| Type of CTX scheme                                          |                             |                             |                             |                   |

|                                                                                               |                |               |               |                |
|-----------------------------------------------------------------------------------------------|----------------|---------------|---------------|----------------|
| - 5-FU-Mono based                                                                             | 26 (19%)       | 43 (31%)      | 37 (28%)      | 0.077          |
| - Oxaliplatin / Irinotecan based dual (CAPOX, FOLFOX, XELIRI, FOLFIRI)                        | 34 (25%)       | 39 (28%)      | 29 (22%)      | 0.040          |
| - None                                                                                        | 31 (23%)       | 45 (32%)      | 52 (39%)      |                |
| - One agent                                                                                   | 71 (52%)       | 58 (41%)      | 51 (39%)      |                |
| - Both agents (sequentially)                                                                  | 0 (0%)         | 2 (1%)        | 3 (2%)        | 0.231          |
| - Oxaliplatin / Irinotecan based triple (FOLFOXIRI)                                           | 73 (54%)       | 95 (67%)      | 81 (61%)      | 0.077          |
| - Biological included (Bevacizumab, Panitumumab, Cetuximab, Tivozanib, Matuzumab)             | 0 (0%)         | 9 (6%)        | 27 (21%)      | <0.001         |
| - Other agents (Aflibercept, Regorafenib, Mitomycin C, TAS 102/Lonsurf, Phase I study agents) |                |               |               |                |
| <b>(B) Chemotherapy in palliative patients (% of PAT Patients)</b>                            | <b>n = 104</b> | <b>n = 86</b> | <b>n = 60</b> | <b>p-value</b> |
| Chemotherapy received since first diagnosis of metastasis ( <i>missing n=2</i> )              | 76 (75%)       | 68 (79%)      | 46 (77%)      | 0.763          |
| - Number of CTX cycles (months) received: mean (range)                                        | 9.5 (0–28)     | 9.6 (0–31)    | 6.7 (0–30)    | 0.071†         |
| Type of CTX scheme                                                                            |                |               |               |                |
| - 5-FU-Mono based                                                                             | 15 (15%)       | 31 (36%)      | 16 (27%)      | 0.005          |
| - Oxaliplatin / Irinotecan based dual (CAPOX, FOLFOX, XELIRI, FOLFIRI)                        | 27 (28%)       | 28 (33%)      | 18 (30%)      | 0.303          |
| - None                                                                                        | 18 (18%)       | 22 (26%)      | 18 (30%)      |                |
| - One agent                                                                                   | 53 (54%)       | 36 (42%)      | 24 (40%)      |                |
| - Both agents (sequentially)                                                                  | 0 (0.0%)       | 0 (0%)        | 0 (0%)        | -              |
| - Oxaliplatin / Irinotecan based triple (FOLFOXIRI)                                           | 52 (53%)       | 57 (66%)      | 35 (58%)      | 0.190          |
| - Biological included (Bevacizumab, Panitumumab, Cetuximab, Tivozanib, Matuzumab)             | 0 (0%)         | 7 (8%)        | 16 (27%)      | <0.001         |
| - Other agents (Aflibercept, Regorafenib, Mitomycin C, TAS 102/Lonsurf, Phase I study agents) |                |               |               |                |

\* $\chi^2$  or Fisher's exact test, except †ANOVA; CAPOX = Capecitabine / Oxaliplatin; CTX=chemotherapy; 5-FU = 5-Fluorouracil; FOLFOX = Folinic acid / 5-FU / Oxaliplatin; FOLFIRI = Folinic acid / 5-FU / Irinotecan; FOLFOXIRI = Folinic acid, 5-FU, Oxaliplatin and Irinotecan; LA = lymphadenectomy of distant lymph nodes; abd. organs = other abdominal organs; VATS = video assisted thorascopic surgery; XELIRI = Capecitabine / Irinotecan. .

**Table S3.** Excel sheet with anonymized patient data used for this study. (See attached file).

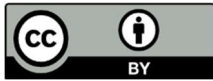

© 2019 by the authors. Licensee MDPI, Basel, Switzerland. This article is an open access article distributed under the terms and conditions of the Creative Commons Attribution (CC BY) license (<http://creativecommons.org/licenses/by/4.0/>).
